# Supplementary material for: Epitope Mapping of Japanese Encephalitis Virus Neutralizing Antibodies by Native Mass Spectrometry and Hydrogen/Deuterium Exchange
Source: MDPI journal article supplement (doi:10.3390/biom14030374), 2024-03-20
Supplement: s1 [file s1]

## Supporting Information

### Epitope mapping of Japanese encephalitis virus neutralizing antibodies by native mass spectrometry and hydrogen deuterium exchange

Jagat Adhikari,<sup>1,7</sup> James Heffernan,<sup>2</sup> Melissa Edeling,<sup>2</sup> Estefania Fernandez,<sup>2</sup> Prashant N. Jethva<sup>1</sup>, Michael S. Diamond,<sup>2,3,4,5</sup> Daved H. Fremont,<sup>2,5,6</sup> Michael L. Gross<sup>1</sup>

1Department of Chemistry, Washington University in St. Louis, Saint Louis, MO 63130, USA; jagat.adhikari@covanttx.com (J.A.); pjethva@wustl.edu (P.N.J.)

2Department of Pathology and Immunology, Washington University School of Medicine, Saint Louis, MO 63130, USA; jheffernan@wustl.edu (J.H.); melissa.barrow@unimelb.edu.au (M.E.); e1fernandez@ucsd.edu (E.F.); mdiamond@wustl.edu (M.S.D.); fremont@wustl.edu (D.H.F.)

3Department of Medicine, Washington University School of Medicine, Saint Louis, MO 63130, USA

4Andrew M. and Jane M. Bursky Center for Human Immunology and Immunotherapy Programs, Washington University School of Medicine, Saint Louis, MO 63130, USA

5Department of Molecular Microbiology, Washington University School of Medicine, Saint Louis, MO 63130, USA

6Department of Biochemistry and Molecular Biophysics, Washington University School of Medicine, Saint Louis, MO 63130, USA

\*Correspondence: mgross@wustl.edu

†Current Address: Covant Therapeutics, Boston, MA 02210, USA.

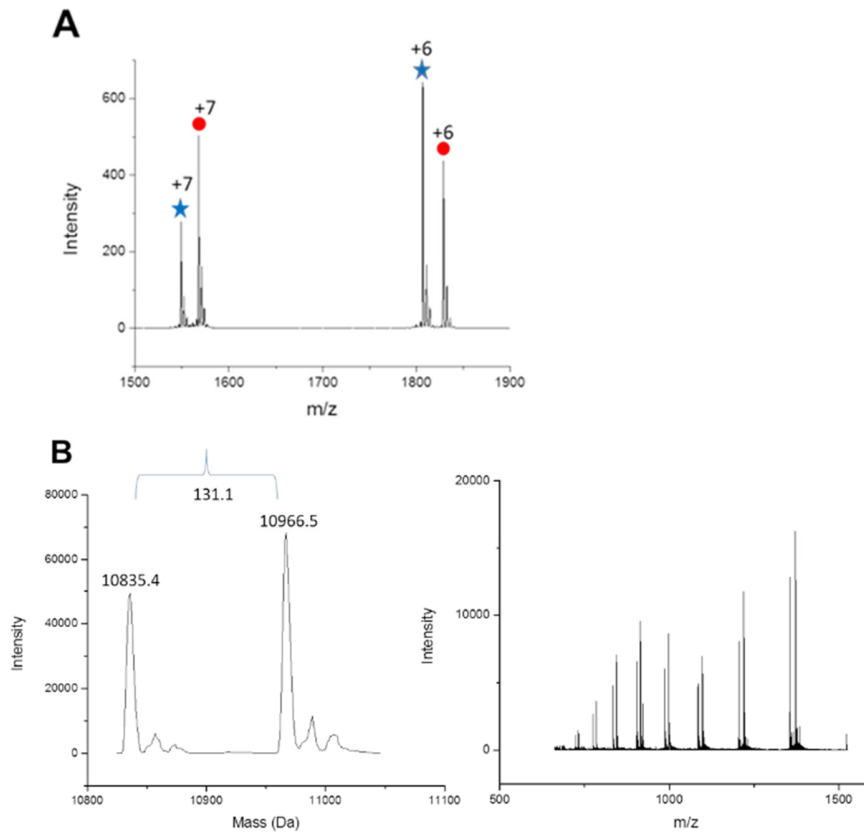

### C Sequence of JEV E-DIII

MTTYGMCTEK FSFAKNPVDT GHGTVVIELS YSGSDGPCKI PIVSVASLND  
MTPVGRLTV NPFVATSSAN SKVLVEMEPP FGDSYIVVGR GDKQINHHWH KA

**Figure S1.** Mass spectrum of JEV E-DIII acquired under (A) native ESI, (B) denaturing electrospray; deconvoluted mass spectrum (left) and raw spectra (right). (C) Sequence of JEV E-DIII. JEV E-DIII contains one disulfide bond. The difference in mass, 10966.6 Da (red circles), 10835.6 Da (blue stars), is 131.1 Da the mass of an initiator methionine at the N terminus.

**Table S1.** Binding affinity measurements of each of the MAbs generated against JEV E-DIII was measured by biolayer interferometry using an Octet-Red96 device (Pall ForteBio).

|   | JEV MAb  | $k_a$  | $k_d$   | $K_d$ (nM) SS | $K_d$ (nM) Kinetic | $t_{1/2}$ (s) |
|---|----------|--------|---------|---------------|--------------------|---------------|
| 1 | JEV E13  | 3.18e5 | 8.53e-4 | 7             | 2.7                | 1820          |
| 2 | JEV E31  | 6.39e4 | 1.95e-3 | 63            | 31                 | 383           |
| 3 | JEV E106 | 4.63e4 | 1.02e-3 | 73            | 22                 | 267           |
| 4 | JEV E128 | 8.65e4 | 1.83e-3 | 43            | 21                 | 355           |
| 5 | JEV E131 | 1.1e5  | 1.35e-3 | 32            | 21                 | 320           |
| 6 | JEV E143 | 3.79e4 | 1.43e-3 | 23            | 38                 | 330           |
| 7 | JEV E27  |        |         | No binding    |                    |               |

Table S2. List of the m/z values and the molecular weights obtained for the JEV-E-DIII and the antibodies from native-MS spectra.

| Sample   | Complex status        | Charge state (z) |               |               |               |           |           |           |           |           |           |           |           | molecular weight |
|----------|-----------------------|------------------|---------------|---------------|---------------|-----------|-----------|-----------|-----------|-----------|-----------|-----------|-----------|------------------|
|          |                       | 18               | 19            | 20            | 21            | 22        | 23        | 24        | 25        | 26        | 27        | 28        | 29        |                  |
| JEV DIII | Unbound               | 1806.825 (z6)    | 2168.025 (z5) | 2709.695 (z4) | 3612.83 (z3)  |           |           |           |           |           |           |           |           | 10836.0 Da       |
|          |                       | 1828.730 (z6)    | 2194.115 (z5) | 2742.640 (z4) | 3656.480 (z3) |           |           |           |           |           |           |           |           | 10967.0 Da       |
| CHK-166  | Unbound               |                  |               |               |               | 6515.3    | 6243.82   | 5993.865  | 5763.125  | 5549.895  | 5351.63   |           |           | 149820.4 Da      |
|          | 1:1 complex (Unbound) |                  |               |               |               | 6515.415  | 6244.05   | 5993.94   | 5763.335  | 5549.81   |           |           |           | 149836.7 Da      |
|          | 1:1 complex (~10%)    |                  |               |               |               |           | 6695.305  | 6427.245  | 6180.235  | 5951.06   |           |           |           | 160656.5 Da      |
| JEV-128  | Unbound               |                  |               |               | 7084.475      | 6762.17   | 6468.28   | 6198.695  | 5950.84   | 5721.665  |           |           |           | 148753.9 Da      |
|          | Unbound               | 8264.84          | 7829.75       | 7438.265      | 7083.995      | 6762.465  | 6468.97   | 6199.3    | 5951.565  | 5722.075  |           |           |           | 148755.8 Da      |
|          | 1:1 complex           | 8875.345         | 8400.0000     | 7979.745      | 7599.67       | 7253.735  | 6939.105  | 6650.17   | 6383.75   | 6138.49   | 5911.225  |           |           | 159577.2 Da      |
|          | 1:2 complex           |                  |               |               |               |           |           | 7107.72   | 6823.24   | 6561.05   | 6317.5    | 6092.22   | 5881.775  | 170555.0 Da      |
| JEV-31   | Unbound               |                  |               |               |               | 6764.5400 | 6469.7300 | 6200.0150 | 5951.9050 | 5723.0800 | 5511.0750 |           |           | 148778.5 Da      |
|          | 1:1 complex           |                  | 8412.8250     | 7992.2850     | 7611.9950     | 7265.7250 | 6949.2650 | 6660.185  | 6393.405  | 6148.585  |           |           |           | 159830.1 Da      |
|          | 1:2 complex           |                  |               | 8542.34       | 8136.9        | 7764.085  | 7429.72   | 7119.345  | 6833.9150 | 6569.8550 | 6327.7300 | 6101.0900 | 5890.2450 | 170808.0 Da      |
| JEV-106  | Unbound               |                  |               |               | 7084.41       | 6754.79   | 6460.885  | 6191.755  | 5943.885  | 5715.505  |           |           |           | 148580.8 Da      |
|          | 1:1 complex           |                  |               |               |               |           |           | 7078.81   | 6825.09   | 6562.56   | 6318.93   | 6093.475  |           | 159602.7 Da      |
|          | 1:2 complex           |                  |               |               |               |           | 7417.94   | 7109.42   | 6825.09   | 6562.56   | 6318.93   | 6093.475  |           | 170589.0 Da      |
| JEV 131  | Unbound               |                  |               |               | 7087.295      | 6757.425  | 6463.35   | 6194.07   | 5946.06   | 5723.47   |           |           |           | 148636.7 Da      |
|          | 1:1 complex           | 8870.195         | 8402.94       | 7983.125      | 7602.815      | 7257.13   | 6950.085  | 6660.47   | 6395.29   | 6141.685  | 5914      |           |           | 159640.7 Da      |
|          | 1:2 complex           |                  |               |               | 8125.045      | 7757.295  | 7419.435  | 7110.645  | 6825.915  | 6563.57   | 6321.145  | 6094.07   | 5883.185  | 170620.0 Da      |
| JEV-143  | Unbound               |                  |               |               |               | 6511.955  | 6240.54   | 5991.08   | 5760.425  | 5546.825  | 5348.685  |           |           | 149747.8 Da      |
|          | 1:1 complex           |                  | 8452.94       | 8030.13       | 7648.03       | 7300.225  | 6983.145  | 6698.915  | 6431.4    | 6177.99   | 5955.17   |           |           | 160587.5 Da      |
|          | 1:2 complex           |                  |               |               |               | 7460.49   | 7149.93   | 6864.025  | 6600.015  | 6355.75   | 6128.555  | 5917.04   |           | 171563.4 Da      |
| JEV-27   | Unbound               |                  |               |               | 7071.47       | 6734.51   | 6469.27   | 6199.62   | 5951.715  | 5723.305  |           |           |           | 148766.2 Da      |
|          | No complex formed     |                  |               | 7111.72       | 6773.79       | 6477.665  | 6207.5    |           |           |           |           |           |           | ~148000.0 Da     |

Figure S2: Deconvoluted Native MS spectra for JEV-DIII in the absence and presence of different antibodies. Mass spectra are deconvoluted using Protein Metrics (PMI) intact mass analysis module.

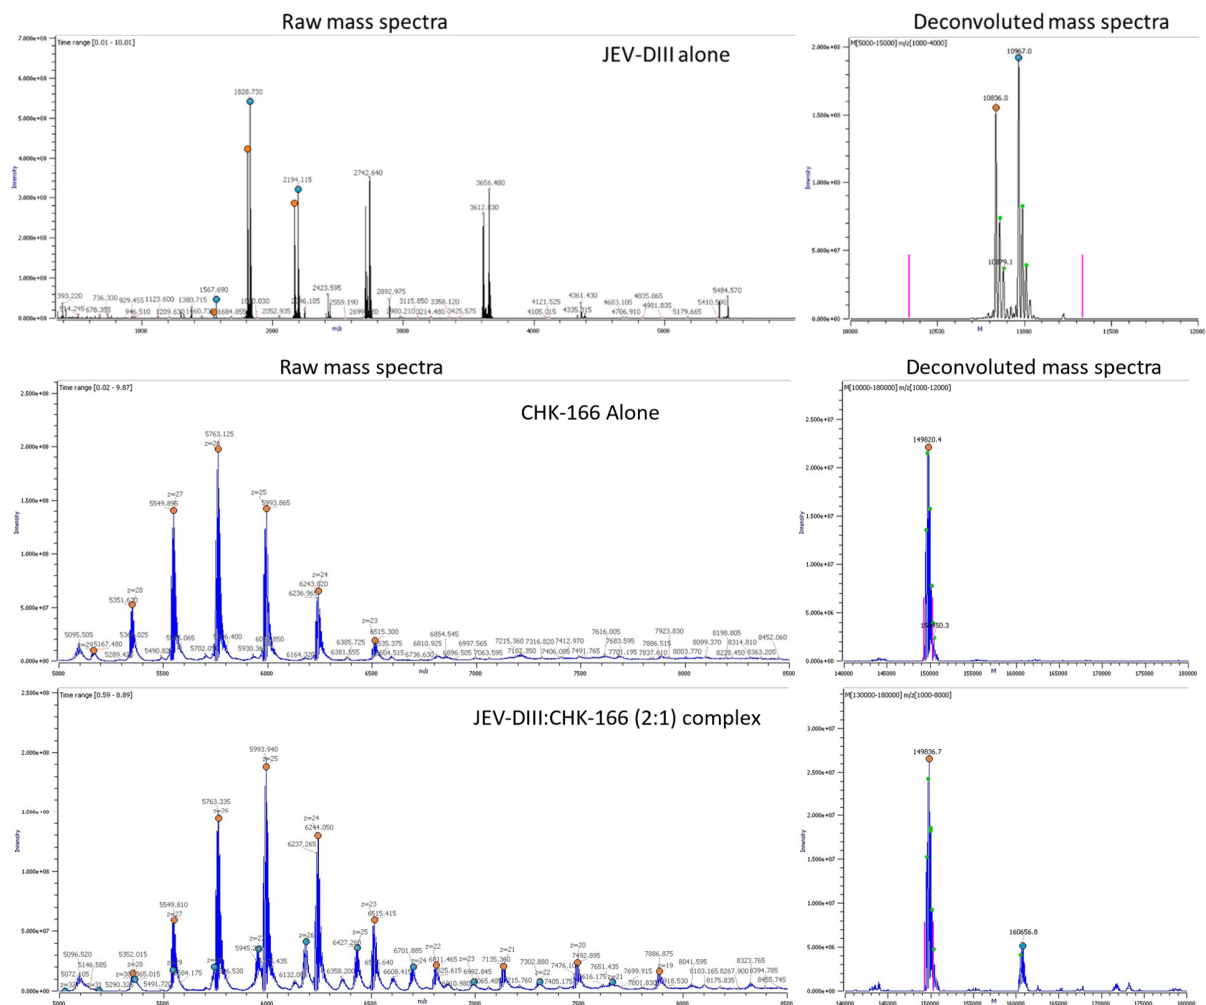

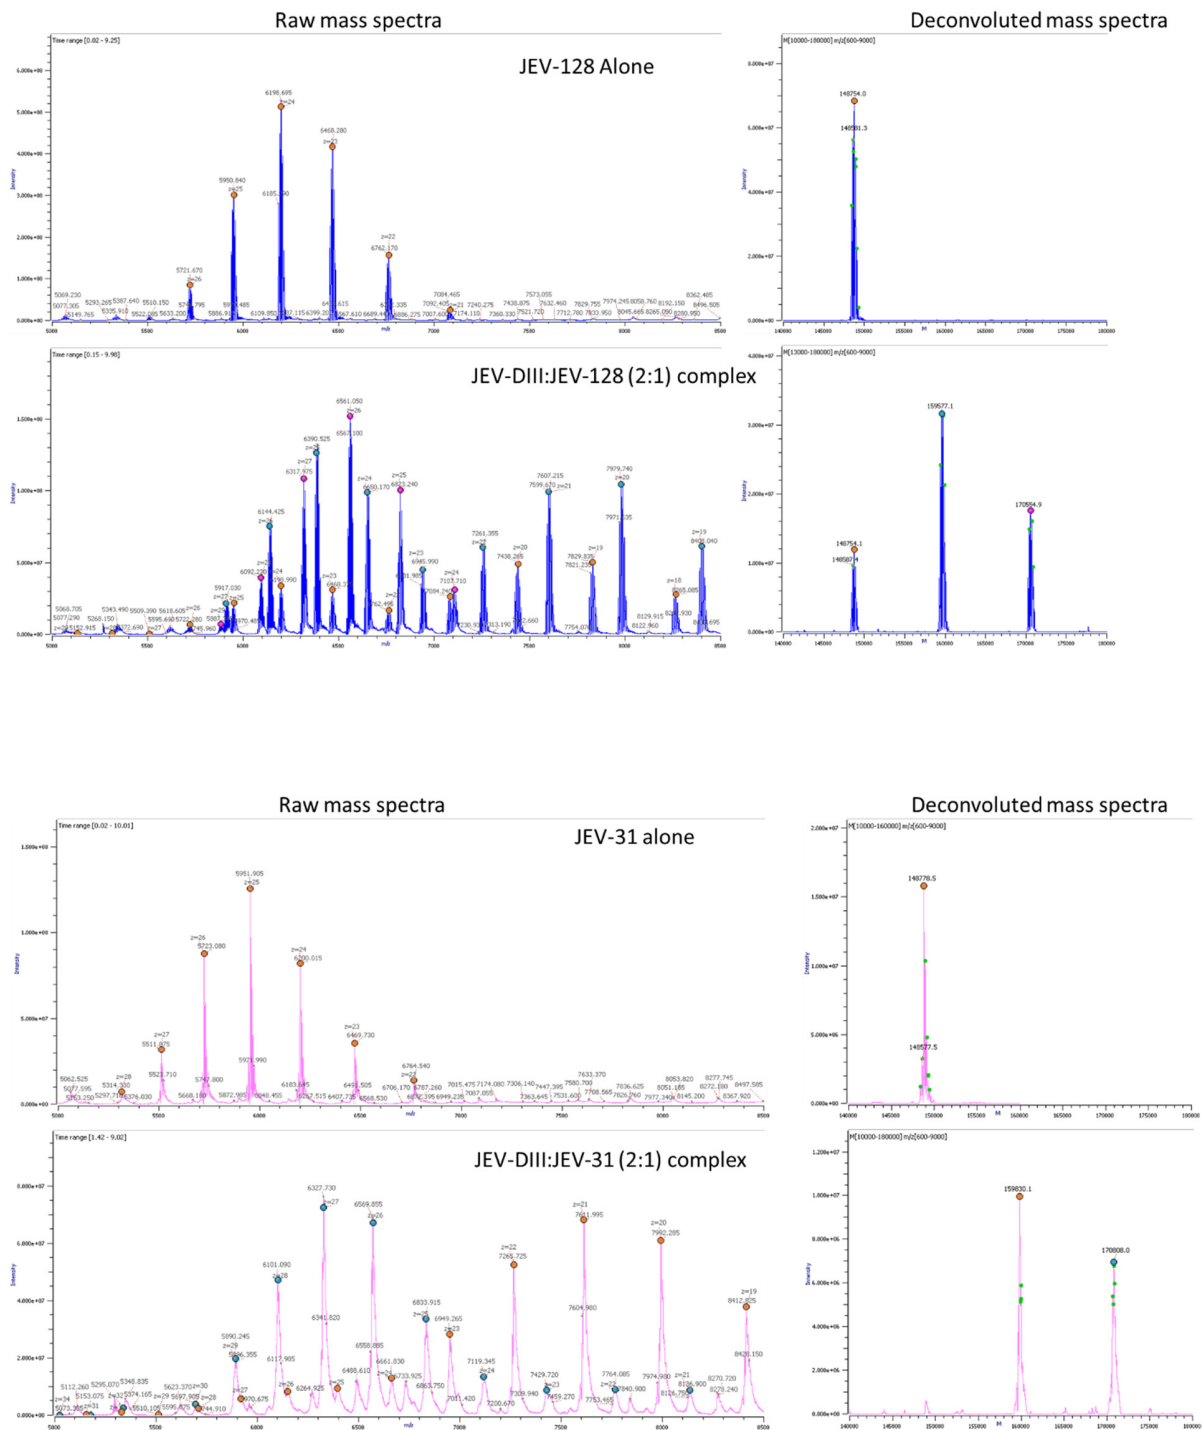

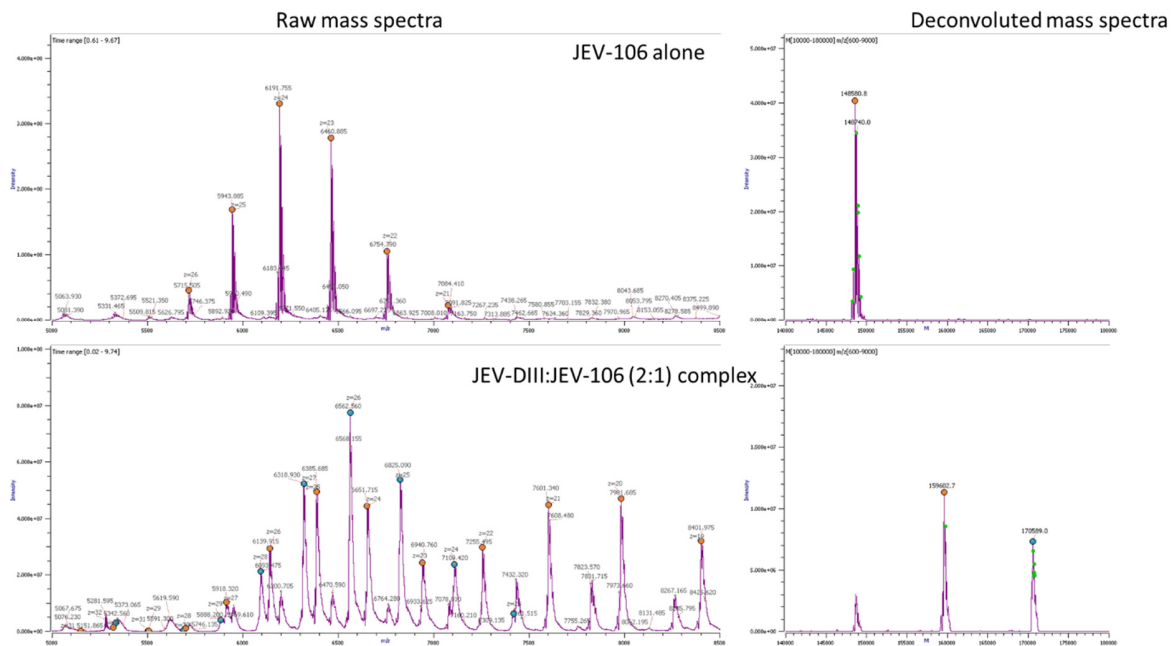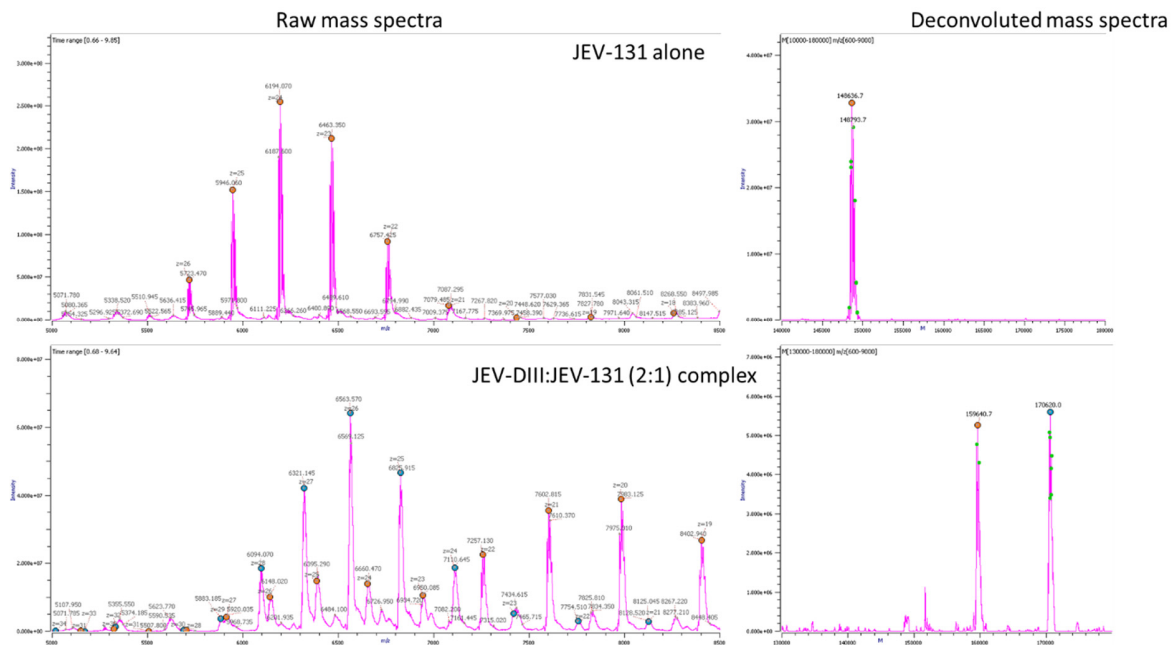

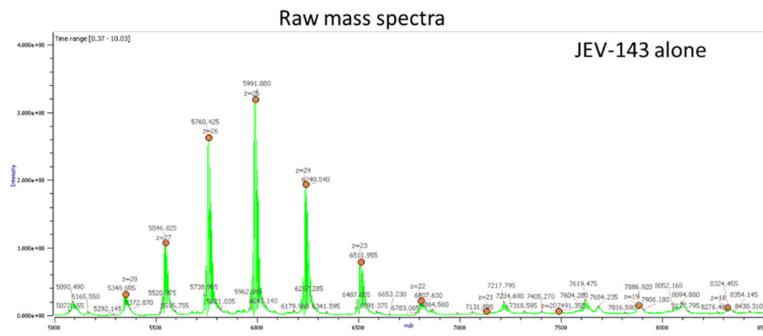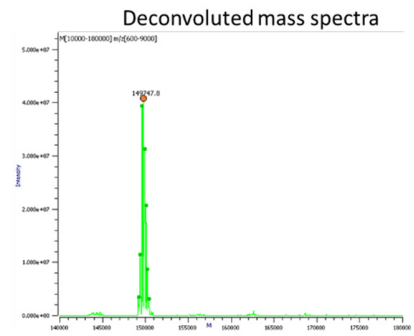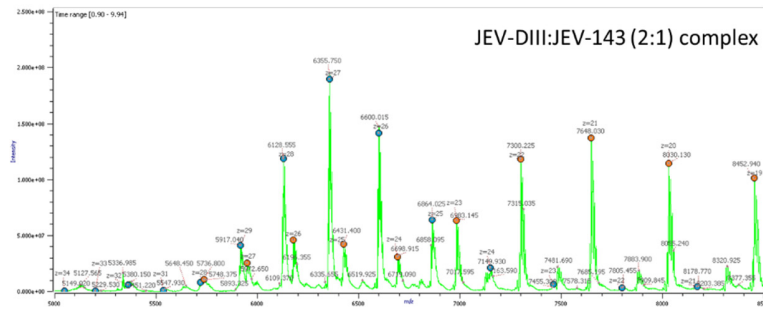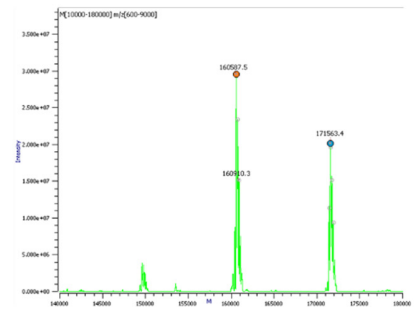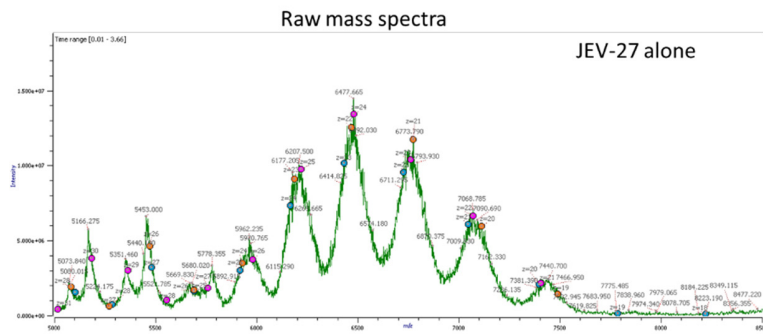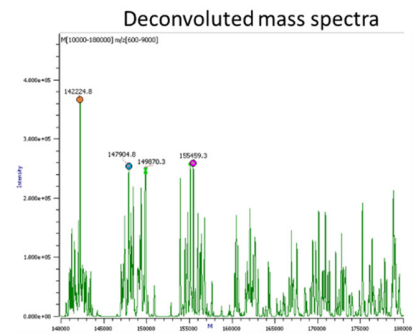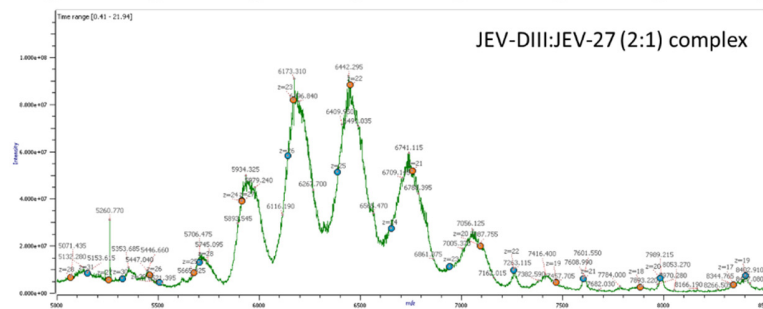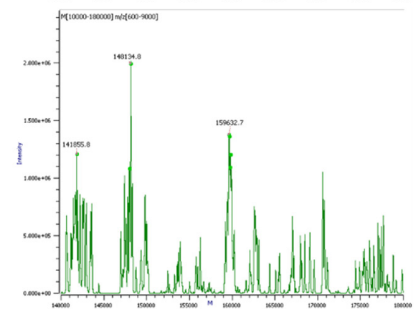

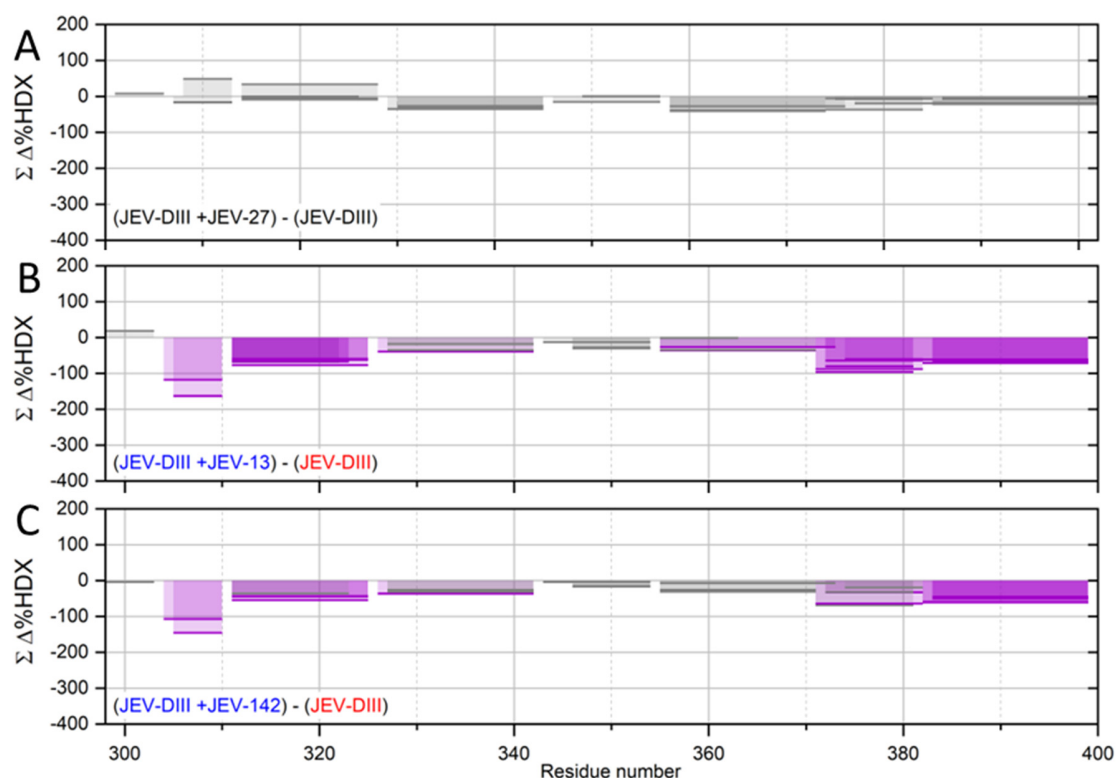

Figure S3: Differential Wood's plot for the JEV DIII in the presence and absence of antibodies JEV-27, JEV-13, and JEV-142. Cumulative sum of differences across all HDX time points for each peptide was calculated. Based on propagated error in HDX measurements, statistically protected peptides were highlighted. The gray bars depict peptides where there is no significant change in the bound vs. unbound states ( $p = 0.01$ ) while violet bars indicate peptides exhibiting protection upon binding to antibody.
